1 SPOILS OF WAR AND PEACE: ENEMY ADOPTION AND QUEEN-RIGHT COLONY  
2 FUSION FOLLOW COSTLY INTRASPECIFIC CONFLICT IN ACACIA ANTS

3  
4 Intraspecific conflict over vital limited resources can lead to costly fights. How  
5 winners compensate for costs and minimize the threat of Pyrrhic victory is not  
6 well known. This study tracked the outcomes of experimentally induced field  
7 conflicts between highly territorial Acacia ant *Crematogaster mimosae* colonies  
8 using molecular genetics, and discovered that fatal fights significantly decrease  
9 within-colony worker relatedness. We find that reduced relatedness can be  
10 explained by colonies increasing worker number via 1) non-kin enemy adoption  
11 or 2) queen-right colony fusion. We hypothesize that incorporating non-kin  
12 enemies can speed recovery from conflict when resource defense is paramount.  
13 In the case of queen-right colony fusion, territorial defense benefits could  
14 outweigh fitness costs. We provide evidence that winners of colony fights have  
15 reduced worker forces to defend larger territories. Field assays indicate that post-  
16 fight colonies are more vulnerable to heavy browsing of host trees by mega-  
17 herbivores and takeover by competitors following conflict. We discuss the  
18 implications of our findings for ant colony cohesion and recognition systems.

19

20 KEYWORDS *Crematogaster*, *Acacia drepanolobium*, *conflict costs*, *territorial*  
21 *aggression*, *worker relatedness*, *intraspecific slavery*, *colony fusion*, *Acacia ant*,  
22 *Pyrrhic victory*.

23

24 Intraspecific conflict over resources can be costly. The evolution of assessment  
25 systems enables many adult competitors to settle disputes with minimal physical

26 or energetic escalation [1,2] Still, intense combat does occur over particularly  
27 limited and valuable resources (e.g. mates and territory, but rarely food) [3–5].  
28 Victory in such high-stakes battles can be decided through elaborate displays, or  
29 by violent contests [2] that continue until one opponent concedes from  
30 exhaustion or injury, or dies (wars of attrition [6]; ‘desperado effect’ [7]).

31       Winners benefit from defeating opponents by gaining access to contested  
32 resources. In addition, empirical studies widely document a positive feedback  
33 between successful fighting experiences and probability of victory in future  
34 contests, termed ‘the winner effect’ [8]. Yet by outlasting or dispatching  
35 conspecific contestants, winners are also theorized to accrue costs associated  
36 with escalation, including opportunity costs and loss of resource holding capacity  
37 [9,10]. As a result, winners may experience a diminished ability to defend  
38 themselves from predators and parasites, or to protect their gains in subsequent  
39 contests [11,12]. This possibility, that winners suffer increased vulnerability after  
40 engaging in fights, should be an important factor affecting potential costs and  
41 benefits of engaging or continuing in conspecific fights [13]; yet experimental  
42 tests are rare [5,14]. Furthermore, whether and how winners respond  
43 behaviorally to cope with fight costs and facilitate recovery remains largely  
44 unexplored. Here we investigate whether winners experience a window of  
45 vulnerability following costly fights, and if so how they might compensate to  
46 speed recovery from conflict.

47       Ants are compelling model organisms for this investigation for two main  
48 reasons. First, violent fights over territory are common [15]. Intruders are grasped

49 or stung by defending workers, which often leads to dismemberment or death for  
50 both combatants. Second, the impact of colony conflicts to winners can be  
51 quantified in discrete units (i.e. individual workers killed). Most ant colonies  
52 exhibit reproductive division of labor where workers forgo direct fitness to rear  
53 immature workers and reproductives produced by the fertile queen(s). As a  
54 consequence of this 'super-organism' arrangement, loss of the queen(s)  
55 ultimately results in colony death [16]. Death of individual workers, however,  
56 need not be fatal to colonies. Instead, these losses can be viewed as the costs of  
57 conflict. Because colony size underlies victory in many ant species, significant  
58 reduction in worker number likely affects a winner colony's ability to protect nest  
59 space and territory after fights. Hence, quantification of worker deaths is directly  
60 relevant to colony condition.

61 Do winners have tactics to recover from deficits incurred as a result of  
62 costly fighting? Models predict that protracted and dangerous fighting most often  
63 occurs when reproductive success or survival is at stake [4]. The mates or  
64 security (e.g. burrows, nest space etc.) that are the payoff of fight success cannot  
65 themselves be used to rebuild the winner's physical condition post-conflict. One  
66 solution to rapidly replenish spent reserves can be cannibalization of defeated  
67 contestants. Some spiders, squirrels, moths, owls, and ants consume  
68 conspecifics after mortal combat for territory or shelter [17–19]. An alternative  
69 path to recovery uniquely available to social insects is rebuilding colony size by  
70 adopting a loser colony's surviving brood and/or workers [20]. In doing so, energy  
71 lost in tissue conversion via consumption could be avoided, and time until viable

72 workers are present is reduced (possibly even approaching zero). The challenge  
73 to this tactic is overcoming nest-mate recognition systems. Although often viewed  
74 as fortresses of cooperative relatives, ant colonies can be permeable to non-kin.  
75 Social and nest parasites invade host nests [21], unrelated queens found nests  
76 cooperatively [22], heterospecific colonies share nests [23], queenless colonies  
77 fuse [24] and some species, including invasive fire ants, reciprocally raid  
78 neighboring colonies for brood, creating genetically blended colonies [25].  
79 Mechanisms enabling tolerance for non-kin within nests include host chemistry  
80 mimicry by usurpers, weak discrimination, recognition errors, signal mixing and  
81 environmental modification of recognition cues [24,26]. In the latter case, even  
82 contact with nest material can alter aggression patterns in ants [27]. Taken  
83 together there appears to be a strong possibility that individuals from defeated  
84 colonies can themselves become 'spoils of war', incorporated into post-conflict  
85 winner colonies regardless of relatedness to the usurping colony.

86       Through a series of field manipulations with the African Acacia-ant  
87 *Crematogaster mimosae* colonies we tested the hypotheses that intraspecific  
88 conflict for nest space on *Acacia drepanolobium* trees results in significant  
89 casualties for victor colonies and following these colony depletions, winners are  
90 less able to defend host trees against herbivores and competitors. We also use  
91 molecular markers to assess the outcome of conspecific fights and examine the  
92 impact of fights on the genetic composition of colonies. We predicted that  
93 territorial battles between conspecifics result in complete colony takeovers, and

94 that post-conflict winner workforces are built back in part through the adoption of  
95 their non-kin enemies.

96

## 97 METHODS

98 This study was conducted from July 2011 to March 2012 at the Mpala  
99 Research Centre in Laikipia, Kenya (37°53' E, 0°17' N). There as in many East  
100 African savannas, colonies of Acacia-ant *Crematogaster mimosae* battle  
101 elephants, giraffe, baboons, insect herbivores, conspecific and heterospecific  
102 Acacia-ant competitors (*C. nigriceps*, *C. sjostedi* and *Tetraponera penzigi*) to  
103 protect or maintain sole control of *Acacia drepanolobium* trees with which they  
104 are obligate mutualists [28]. Colonies gain additional domatia (swollen thorn  
105 nesting spaces) by initiating aggressive inter- and intra-specific wars to displace  
106 neighboring colonies from their host plants [28]. Territorial battles also occur  
107 when *A. drepanolobium* canopies grow together and when elephants topple trees  
108 into one another [29]. In high-density, monospecific stands of *A. drepanolobium*  
109 where >99% of trees are occupied by ants, up to 7.5% of resident colonies may  
110 lose host trees to other ant species over a 6-month period [30]. *C. mimosae*  
111 colonies are numerically dominant in the system (inhabiting 52% of trees [31]),  
112 suggesting substantial intraspecific conflict and turnover within this species,  
113 though exact rates are unknown.

114 Defeated colonies cede not only valuable domatia, but also their surviving  
115 immature and possibly even mature workers [20]. In this widely studied  
116 mutualism, there is no evidence of mixed species *Crematogaster* colonies

117 forming after interspecific fighting. Striking morphological differences would make  
118 the presence of such colonies easy to observe. By contrast, in conspecific  
119 conflicts, the identity of winners and losers cannot be visually detected. To  
120 determine the consequences of conspecific conflict in this species we induced  
121 battles between neighboring *C. mimosae* colonies and used genes and behavior  
122 to track the consequences.

### 123 Experimental Colony Selection

124 Mature *Crematogaster mimosae* colonies can be small and restricted to single  
125 host trees or form large multi-tree clusters with several queens and hundreds of  
126 thousands of individuals [30,32]. To ensure that colonies would fight in  
127 experimental battles and not retreat to auxiliary host trees, we chose only  
128 colonies inhabiting single trees with basal diameter of 32-68 mm ( $X + SE =$   
129  $45.4 \pm 1.31$ ). Colonies on trees of this size ranged from an estimated 2,697 to  
130 9,870 workers ( $X + SE = 4999 \pm 255$ , calculated as domatia number \* mean  
131 number of workers per gall, 68.5) [28].

132 Focal colony trees were all located close enough together that the canopies  
133 could be physically conjoined.

134 Single tree colonies were identified using reciprocal transplants of individual  
135 workers and watching for aggressive interactions with resident ants [28,33].

136 Latex gloves washed with 95% ethanol prevented between-trial chemical  
137 contamination of individuals. To aid observation of fast moving transplanted  
138 workers, we applied florescent powder (Day-Glo Color Corp., Cleveland, OH) to  
139 the thorax of trial ants. We treated individuals of the resident colony in the same  
140 manner to act as procedural controls. If non-resident ants were quickly attacked

141 (but resident controls were not) we inferred that trees belonged to separate  
142 colonies [28]. We repeated this method on neighboring trees up to 8m away to  
143 confirm experimental colony monodomy . Each colony within the pair was  
144 identified with metal tags as either A or B with a shared Fight ID number (Table  
145 1).

#### 146 *Manipulations*

147 Between 14-July and 04-August 2011, we induced fights between colonies  
148 by tying the canopies of the two experimental trees together with wire. *Acacia*  
149 *drepanolobium* stems are flexible and tolerated bending. Canopies remained  
150 connected for 8 months after fights.

151 Immediately prior to fights we collected three healthy domatia filled with live  
152 workers and brood from each tree. These ants were kept contained and isolated  
153 in the lab, and fed on a diet of sugar water and tuna. To determine the identity of  
154 the winning colony, live individuals ( $N = 2-4$  from each of the pre-fight A and B  
155 colonies) were returned to the field and placed on the main stems of both trees  
156 on day 6 after fights and observed in the manner of reciprocal transplants  
157 described above. Winner and loser colonies were determined by the combined  
158 outcome of these behavioral experiments and molecular genetics (below).

#### 159 *Costs of Fighting to Winners*

160 During territorial battles, workers from each colony engage in fights to the  
161 death, with larger colonies the more likely victor [28]. Colony fights are expected  
162 to produce heavy winner casualties. To quantify these costs we placed large  
163 plastic tarps secured at ground level between some paired fight trees ( $N = 7$ ) and  
164 collected workers that fell from host plants when canopies were experimentally

165 joined and fighting commenced. Dead and injured workers on tarps were  
166 collected every 24 hours (if fights lasted more than one day). Non-ant debris was  
167 removed and remaining workers were dried and weighed (Mettler Electronic  
168 Balance). The weight of 10 intact workers/10 gave an average individual worker  
169 mass for each colony. Total casualties were estimated from the mass of tarp  
170 casualties. Our casualty values are likely underestimated as wind removed some  
171 dead ants from tarps in the field.

172 To parse winner and loser colony contribution to total casualties, we  
173 genotyped (N=15-16) individuals collected from tarps of 5 of these 7 fight pairs  
174 and matched them to their respective colonies following molecular protocols  
175 (below). We calculated the cost to winner colonies as the total worker loss and  
176 proportion of the initial colony lost.

### 177 *Vulnerability Associated with Fighting*

178 Newly acquired territory (as well as original host trees) may be  
179 precariously defended by a diminished worker force after fights, and at risk from  
180 attack by other space-limited neighbors. To assess vulnerability, we selected  
181 single tree colonies similar in size to experimental fight trees as controls (N = 10  
182 each for controls and experiment fights; Welch's t test for tree diameter  
183 difference between groups  $t_{13,0} = -1.74$ ,  $P = 0.105$ ).

184 We examined changes in colony response to simulated large mammalian  
185 herbivore browsing using methods modified from [34]. Two observers carefully  
186 approached trees. Each visually identified an isolated branch with new growth,  
187 and one swollen thorn domatia within 15 cm of the tip. Disposable 'mitts' crafted  
188 prior to fieldwork (two sheets of paper towel 11"x6" folded over by 1 inch and



189 taped along 3 sides) were placed on each surveyor's right hand. With a leather-  
190 gloved left hand, focal branches were simultaneously raked 3 times and then  
191 enveloped by the mitt. Worker ants swarming on mitts after 30 seconds were  
192 collected along with the mitt into a sealed bag. Bags were frozen and worker  
193 contents subsequently counted. Surveys occurred on each of the 3 days before  
194 experimental fights were induced (within tree replication  $N = 6$ ; 2 surveyors x 3  
195 days), and then again beginning 6 days after paired fights concluded.

196 Tree main stems are a primary access point for host invasion by ant  
197 competitors [33,35], We used photographs taken 3 days before fights and again  
198 6 days after to assess changes in colony defense of stems on the simulated  
199 herbivory trees from above ( $n=5$  photos from each period, 2 morning and 3  
200 afternoon). Macro-digital photos always captured the south-facing plane of stems  
201 and adjacent size standard ruler. We recorded the number of ant heads visible in  
202 the frame from ground up to 10 cm.

203 Change in average response within colonies between controls and  
204 experimental fights were analyzed using  $t$ -tests in JMP 8.0.

### 205 *Colony Relatedness and Enemy Adoption*

#### 206 *Sampling / collection methods*

207 Individuals from  $N = 18$  experimental colonies were analyzed using  
208 molecular techniques. Before trees were tied together we collected pre-fight  
209 workers from each experimental colony into a collecting vial (70% ethanol) in the  
210 field.

211 For post-fight collections, we collected 5 domatia from each experimental  
212 fight combined tree system on Sept 15, 2011 (hereafter 2mo) and March 22,

213 2012 (hereafter 8mo). Domatia were frozen, then opened and the contents  
214 (mature and immature ants) were pooled into vials with 70% ethanol. For pre-  
215 fight samples as well as 2mo samples, only intact adult workers were genotyped.  
216 Individuals were inspected under a dissecting microscope to ensure they had no  
217 appendages missing (indicating they were alive at the time of collection and not  
218 cached casualties or emerged workers that were recently killed) and to exclude  
219 body parts of other individuals. For 8mo samples we genotyped only immature  
220 ants (nearly all worker pupae, but for colonies with < 24 pupae we extracted DNA  
221 from large larvae or male pupae). Immature ants collected 8 months after fights  
222 are unlikely to have been present at the time of conflict (Development time -  
223 Appendix 1). Outcomes where all 8mo samples belong exclusively to one colony  
224 suggest that the takeover was complete and resulted in the loser queen's death.  
225 Alternatively, if genotypes matching both Pre-fight colonies could be found  
226 among the immatures, an incomplete takeover is indicated (no loser can be  
227 identified because both queens survived and continued to contribute to worker  
228 production). Finally, novel genotypes that could not be explained by different  
229 fathers but the same mother would suggest that a new queen was present within  
230 the colony. This could occur through secondary takeover by non-relatives, or  
231 possibly via the emergence of reproductive daughter queens [32]. For colonies in  
232 each fight pair, sample sizes are listed in Table 1 but roughly follow: 8 workers  
233 from each colony prior to fights (Pre-fight), then 48 workers and 24 immature  
234 ants after 2 months and 8 months respectively.

235 *Lab protocols*

236           Individuals were extracted either using Qiagen DNA easy kits or Qiagen  
237 Puregene extraction techniques. We genotyped Pre-fight and 8mo individuals  
238 using 17 microsatellite loci (PCR protocols described in [36]).  
239 For 2mo samples, where 48 individuals from each fight pair were analyzed, we  
240 first determined which loci contained alleles that could distinguish between fight  
241 pair colonies (from Pre-fight analysis results). We selected the 3-5 loci that  
242 differed most in frequency between colonies, and included only primers from  
243 those loci in the PCR reaction. If individuals could not be definitively assigned  
244 with the subset of primers, they were re-run with more loci. PCR products were  
245 run on a Capillary Electrophoresis Genetic Analyzer (an ABI Prism 3130) at  
246 UCDNA Sequencing Facility at UC Davis and analyzed using GeneScan  
247 software (Applied Biosystems, Carlsbad, CA, USA). Fragment data were  
248 visualized and scored using STRand Version 2.3.69 [37].

249 *Analysis of genetic data*

250           Parentage for each worker was reconstructed using a maximum  
251 likelihood approach implemented in COLONY v2.0.1.8 [38]. Null alleles and  
252 scoring errors were accounted for using a 0.05 default error rate at all loci, and  
253 no *a priori* relationships were assumed. Data for all individuals (from all fight pairs  
254 at all times,  $N = 765$ ) were combined for analysis. Individuals were separated into  
255 full sibling or half sibling families, with associated probabilities of inclusion and  
256 exclusion for each individual (Table 1). Queen number was also estimated, and  
257 the identity of the maternal and paternal lineages at each sampling period were  
258 reconstructed.

259 Allele frequencies obtained from COLONY analysis (above) were used to  
260 calculate relatedness in COANCESTRY v 1.0.0.1 [39]. Relatedness values  
261 between Pre-fight colonies were based on all genetic data from 17 loci. Because  
262 2mo individuals were genotyped at a reduced number of loci, relatedness  
263 estimates within individual winning colonies across all time points (Figure 2) were  
264 based only on data from those restricted 3-5 diagnostic loci. For fight pairs where  
265 genetic reconstruction did not reveal a distinct winner (ID3 and ID9), the Pre-fight  
266 relatedness (Figure 2) used for statistical analysis is the mean of the among-  
267 individual, within-colony relatedness for both Colony A and B. For each fight pair,  
268 individuals were grouped by their sampling origin, Colony A Pre-fight, Colony B  
269 Pre-fight, 2mo, 8mo, and compared to all individuals within the group to produce  
270 average within-colony relatedness at each time period. We report Triadic  
271 Maximum Likelihood estimators of relatedness coefficients, (TrioML) because  
272 values are restricted to fall from 0-1, making interpretation intuitive. In contrast to  
273 other pairwise relatedness estimators, this measure uses a third reference  
274 individual to help minimize error [40]. To test for effects of fighting on relatedness  
275 within colonies through time, we compared the TrioML relatedness values across  
276 Pre-fight, 2mo, and 8mo sampling periods using standard least squares  
277 regression, accounting for repeated measures by including Fight ID as a random  
278 effect. Since TrioML relatedness coefficients are bounded at 0 and 1, we  
279 performed arcsine square root transformations prior to analysis to better meet the  
280 assumption of normality

281 RESULTS

## 282 *Costs of Fighting for Winners*

283 Estimated worker losses in fights between colonies ranged from 390 - 10  
284 073 individuals ( $N = 7$  colonies,  $X + SE = 5,405 + 1,313$  individuals). A subset of  
285 these casualties were genotyped and matched as full or half siblings to Colony A  
286 or B pre-fight (Pre-fight) samples, all with a probability of assignment  $> 0.94$  in  
287 maximum likelihood sibship configurations from COLONY. Winning colonies  
288 experienced high costs to fighting, with 19-56% ( $X + SE = 39 + 7\%$ ,  $N = 5$ ) of the  
289 casualties collected for each fight pair belonging to the victors. Successful  
290 colonies therefore lost on average 1/3 ( $X + SE = 34 + 11\%$ ,  $N = 5$ ) of their initial  
291 worker force.

## 292 *Vulnerability*

293 Following fights, winner colony territories nearly doubled (proportion of  
294 domatia pre- versus post-fight;  $X + SE = 1.9 + 0.08$ ,  $N = 14$ ) and defense of host  
295 trees declined significantly. Canopy defense dropped by more than half  
296 compared to Pre-fight levels as fewer ants from winner colonies responded to  
297 simulated branch herbivory than from control colonies ( $t$  test:  $t_{18} = -3.12$ ,  $P =$   
298  $0.006$ , Fig 1-A). Winner protection of stem access points also fell, with a  
299 marginally significant difference between treatment and controls ( $t$  test :  $t_{18} = -$   
300  $1.95$ ,  $P = 0.067$  Figure 1-B).

## 301 *Colony Genetic Structure*

302 Pre-fight relatedness between colonies was low for all 9 fight pairs  
303 analyzed using molecular markers (TrioML estimate of  $r < 0.08$  for all pairs, Table  
304 1). Sixteen of the 18 colonies were determined to contain full and half sib workers

305 produced by a single queen and two Pre-fight colonies were determined to  
306 include workers produced by multiple queens (Table 1).

307 We infer three different outcomes from molecular analysis of fights;  
308 complete rejection of non-kin, enemy adoption, and fusion. For fight pair ID's 7  
309 and 4, all post-fight individuals ( $N = 68 - 70$  from 2mo and 8mo) were assigned as  
310 full siblings with individuals from only one Pre-fight colony (complete rejection of  
311 non-kin). The remaining 7 pairs contained workers at 2 months after fights that  
312 were matched as full siblings with individuals from both Pre-fight colonies  
313 Consistent with enemy adoption, at 8mo, genotyped brood ( $N = 23$  or  $24$ ) from 5  
314 of these 7 pairs were assigned to only one of the Pre-fight colonies. For these  
315 colonies, molecular data suggests a single queen-right colony succeeded in  
316 conflict and subsequently included unrelated workers, but confirmed that loser  
317 queen(s) were either no longer present or no longer contributing brood to the  
318 colony at 8 months. Surprisingly, for fight ID's 3 and 9, genotyped brood at 8mo  
319 were full siblings with individuals from both Pre-fight colonies, indicating that one  
320 colony did not completely overtake the other and that both Pre-fight queens were  
321 present and producing offspring. Furthermore, 16 individuals (76%) of 8mo  
322 samples from fight ID 3 were classified by COLONY as full sibs with each other  
323 (probability inclusion /exclusion  $>0.99$ ) but were inferred to be the offspring of a  
324 novel maternal genotype. Overall within-colony worker relatedness decreased  
325 significantly from Pre-fight ( $X + SE = 0.72 + 0.03$ ) to 2mo samples ( $0.52 + 0.08$ ;  
326 Linear mixed model:  $R^2 = .80$ ,  $P < .0001$ ; TukeyHSD for Pre-fight, 2mo  
327 comparison:  $P = 0.008$ ). Average relatedness for brood found within each colony

328 at 8 months after fights  $X + SE = 0.68 + 0.08$ ) was similar to Pre-fight worker  
329 relatedness (Tukey HSD for Pre-fight, 8mo comparison:  $P = 0.760$ ) indicative of  
330 restoration of pre-fight relatedness conditions at a colony level (Figure 2).

331

## 332 DISCUSSION

### 333 *Worker Losses and Vulnerability*

334 Are territorial fights between *C. mimosae* colonies costly to winners, and  
335 does conflict weaken the victor's ability to defend resources? We found that  
336 battle casualties reduce winner colony size by 1/3 on average, and as much as  
337 2/3. In contrast to investigations highlighting advantages to combat victory  
338 beyond resource acquisition (e.g. probability of success in future conflicts [33,35]  
339 and better health [41]), we find that after successful fights, winning ant colonies  
340 suffer from a window of vulnerability. *C. mimosae* winners are spread over twice  
341 the territory (initial plus newly gained domatia) and appear susceptible to a loss  
342 of territory value (e.g. removal of extrafloral nectaries, domatia, and reduced tree  
343 growth) from mammal browsing and insect herbivory. Previous manipulations of  
344 ant abundances on *A. drepanolobium* trees reveal a negative relationship  
345 between colony size and branch damage by elephants and beetles [42,43]. The  
346 actively growing shoot tips favored by large herbivores are also the site of  
347 carbohydrate-rich extrafloral nectar production, which colonies rely on to fuel  
348 activity and feed developing larvae [31,44]. Less than one week after  
349 experimentally induced wars, colony defense of host tree canopies dropped by  
350 66% compared to pre-fight levels (Figure 1). Simulated browsing of these  
351 resources incited no defense on 3.5x the number of branches sampled after

352 fights as compared to before. Inability to protect tree-based energy sources  
353 should hinder a colony's ability to produce and sustain workers. Additionally,  
354 activity on tree trunks fell by 62% after fights, and we found a complete absence  
355 of workers patrolling trunks in nearly 5x as many post-fight observation periods  
356 as pre-fight observation periods. It is possible that nest-limited neighbors  
357 discover the diminished resource holding capacity of winners either via territory  
358 scouts [45] or by eavesdropping on the pungent alarm pheromones released  
359 during combat [46,47]. Neighbors may then apply the information gained through  
360 monitoring to target weakened competitors [48]. In a system where colony size  
361 underlies competitive success [28], we document decreased worker number and  
362 defense of hosts by winners. We hypothesize that public battles fought to gain  
363 territory may subject victor colonies to increased risk of attacks and territory loss  
364 [12,49].

#### 365 *Non-kin Adoption During Recovery*

366 Are winner colonies built back through the adoption of losers? We found that  
367 following fights, former non-kin enemies coexist within shared nests. In 56% of  
368 the induced fights we analyzed genetically, despite prior lethal aggression  
369 between competitors, post-fight colonies contained live workers that were full  
370 siblings with the pre-fight loser colony (Table 1). In these cases, losers  
371 represented an estimated 4-44% of post-conflict colonies' workforce. This  
372 integration of losers in these cases was not consistent with queen-right (both  
373 queens present) colony fusion because no brood developing within winner nests  
374 matched loser genotypes at 8 months after fights. We conclude that for these five



375 colonies, loser queens were either killed or escaped during fights. We further  
376 infer that their offspring (undeveloped brood, and possibly surviving workers) are  
377 adopted by the victors, and act as an ephemeral resource for the winner colony.  
378 Genetic similarity between winner and loser colonies does not explain variation in  
379 the incorporation of non-colony members as all averaged pair-wise relatedness  
380 values between fighting colonies were very low (relatedness coefficient  $x < 0.08$   
381 for all colony pair comparisons,  $X + SE = 0.02 + 0.06$ ; 1<sup>st</sup> cousins should exhibit  $r$   
382 values of  $\sim 0.25$ ; Table 1).

383 We estimate that 1,700-5,550 loser brood could remain within domatia  
384 after experimental takeovers. This calculation is based on the average number of  
385 brood per domatia ( $X = 37.3$  from [50]) and the number of domatia on  
386 experimental trees ( $N = 48-150$ ). Since colonies in fighting pairs were estimated  
387 to each contain a similar number of brood prior to conflict, adoption of all loser  
388 brood would provide an instantaneous near doubling of new workers emerging  
389 within the winner colony. Randomly selected *C. mimosae* pupae reared in the lab  
390 become workers in an average of  $X + SE = 8 + 0.74$  days, and well-developed  
391 larvae pupate after an average of  $X + SE = 12 + 0.72$  days (Appendix 1). Pupae  
392 can metamorphose into fully formed workers with no tending or nutritional input  
393 from adults (Appendix 1). Although complete worker development time (egg to  
394 adult) is unavailable for this species, Argentine ants (*Linepithema humile*) display  
395 pupal development rates that are similar to those observed for *C. mimosae* and  
396 require an average of 63 days from oviposition to worker emergence [51].  
397 Consequently, feeding loser brood to egg-laying queens or to larvae instead of

398 adopting them directly would create a months-long payoff lag. Retaining rather  
399 than consuming loser brood may further boost colony size by stimulating the  
400 surviving queen's egg production, as is seen in *Oecophylla* weaver ant colonies  
401 that are experimentally augmented with non-kin pupae [52]. Adoption of  
402 abundant non-kin brood is thus a more efficient way (in terms of both time and  
403 energy) of converting loser individuals into valuable workers than a potential  
404 alternative – cannibalism.

405         Sterile conspecific workers laboring for the fitness benefit of an unrelated  
406 queen and/or colony - historically termed intraspecific slaves (but see [53]) –  
407 have few documented examples in wild ant colonies [15,54]. This study  
408 represents a rare example of this phenomenon, and the first evidence that non-  
409 kin enemy adoption can be triggered experimentally in nature via conflicts  
410 between large territorial colonies. Previous descriptions of natural non-kin  
411 conspecific adoption/enslavement in ants come from species that are close  
412 relatives to facultative and obligate interspecific slave-making taxa [15,55,56].  
413 *Crematogaster*, a species-rich genus (476 known species - [57]), has no known  
414 obligate slavemakers [15,21,58] and diverged from known obligate slave-making  
415 species > 80 mya [59]. Like many other obligate plant ants and cavity nesters,  
416 *Crematogaster* spp. are known to compete strongly with conspecifics for nest  
417 space [60] and invade the domatia of heterospecific neighbors [35]. Conspecific  
418 usurpation, though difficult to detect in nature, has been predicted [55] and  
419 observed ([28], K. Rudolph pers. obs.). Our findings suggest that non-kin  
420 adoption associated with territorial battles could be an overlooked phenomenon,

421 and potentially widespread in ants that engage in conflicts over nest sites or  
422 foraging grounds.

### 423 *Additional Fight Outcomes*

424 Experimentally induced fights had multiple distinct outcomes. While five  
425 winner colonies adopted non-kin orphans, two fights unexpectedly resulted in  
426 queen-right colony fusions (Table 1). In fight ID's 3 and 9, genetic data indicates  
427 that both Colony A and B queens were alive and producing brood within a shared  
428 tree canopy 8 months after fights (Table 1). A unique feature of *C. mimosae*  
429 seems to be that intense intraspecific aggression with extensive mortality can  
430 rapidly give way to tolerance. In other documented cases of non-kin mergers,  
431 worker interactions are rarely characterized by high aggression or lethality  
432 [24,25,54,55,61–65]. Yet we find that in *C. mimosae* colonies mortal combat  
433 transitions to coexistence over the course of hours (active fighting never lasted  
434 for more than 48 hours, and most wars resolved in less than 12 hours). Not only  
435 does aggression toward brood and callow workers cease, but it seems worker-  
436 worker attacks do as well. It appears unlikely in the case of colony fusions that  
437 queens could survive fights without some or many of their adult defenders also  
438 persisting.

439 We do not yet know how de-escalation between fighting colonies may  
440 proceed. It is possible that for conflicts between social insects generally, and  
441 especially colonies with weak size asymmetry, assessment of fighting ability is  
442 difficult [66]. Fights may escalate because the superior competitor cannot be  
443 readily determined (failure of mutual assessment, as discussed in [49], or

444 because contested resources (e.g. nest space) are essential for colony survival  
445 (i.e. there is no assessment; [67]). However, information indicating a growing cost  
446 of conflict (e.g. fight duration) may induce de-escalation behavior in workers, and  
447 protect against Pyrrhic victory. Reciprocal de-escalation in both colonies could  
448 result in such a truce. Non-kin colony cooperation in times of vulnerability has  
449 precedent in ants (e.g. joint colony founding ([22] and queenless colony fusion  
450 [24]) but has been previously unreported in large, mature colonies as a result of  
451 conflict. Regardless of the de-escalation mechanism, ultimate coexistence  
452 appears impossible without strong temporal plasticity in templates of recognition  
453 or chemical cues among adults.

454         Uncovering the patterns and mechanisms of recognition within and  
455 between social insect colonies has long been an area of interest for biologists.  
456 Two primary concerns are how and when the signals used in nestmate  
457 discrimination are acquired. Chemical signals and perception underlying worker  
458 exclusion or acceptance in a colony are not solely inherited; there can be  
459 ecological and environmental effects on both [26,27,68]. Cooperation among  
460 workers can be mediated by queen pheromones and/or learned based on  
461 differences in cuticular hydrocarbons (CHC). These chemical signatures can be  
462 modified by the environment and spread among individuals. In our cases of non-  
463 kin adoption, winners' templates for tolerance appear to change as a result of  
464 fighting. Non-kin losers may retain cues that winners detect as distinct but  
465 overlook to enable acceptance of more individuals into the colony (active  
466 adoption/ tolerance; [65]. Alternatively, through the extensive physical contact

467 involved in fighting, individuals may blend and dilute CHC signals, making non-  
468 kin indistinguishable from one another (passive affiliation; [20,24,69]). We suggest  
469 this system may be fertile ground for future studies examining how colony  
470 chemistry is altered by conflict, especially as host tree takeovers are frequent.

471 Our third outcome showed that two winner colonies did not adopt non-kin  
472 (at least in numbers appreciable in our samples, Table 1). During fights  
473 representing each of our three outcomes discussed above, we occasionally  
474 witnessed advancing workers ejecting brood from their opponent's domatia. If all  
475 loser workers were eliminated in battle and this brood ejection behavior  
476 continued, it could explain the lack of non-kin in all post fight samples for ID's 5  
477 and 7. The findings of complete rejection, as well as temporary rejection followed  
478 by acceptance of non-kin in this study, underscore the tension in colonies  
479 between the benefits of incorporating non-kin versus the threat that non-kin could  
480 represent to colony cohesion. Further exploration could help determine whether  
481 reduced relatedness among nestmates following conflict has unexpected  
482 consequences for colony function and the extent of recognition plasticity. For  
483 example, do adoptees perform work within winner colonies and are some  
484 colonies' signatures fundamentally incompatible with others?

#### 485 *Conclusions*

486 Our findings represent a rare experimental quantification of the costs and  
487 consequences of escalated fighting for winners in their natural environment.  
488 Application of molecular analysis to a behavioral study exposed the leakiness of  
489 colony boundaries in *C. mimosae*. Through field manipulations, we produced a

490 pattern long inferred by other researchers [17,55,56,61,70] that ant conflicts over  
491 territory predictably decrease within-colony relatedness (via non-kin enemy  
492 adoption and colony fusion Fig 2), and that colony cohesion appears robust to  
493 this perturbation. Importantly, this non-kin affiliation occurs within large mature  
494 colonies, not recently founded ones [71] A study of conflict in wood ants showed  
495 that violent wars fought to expand territory produced casualties that were fed to  
496 developing larvae [72]. Our work points to a different, potentially  
497 underappreciated source of profit for colonies that succeed in conflict. After costly  
498 contests, *C. mimosae* winners at times gain not only valuable new host trees but  
499 also living spoils of war in the form of non-kin adoptees that provide victors with  
500 an accelerated means to colony size recovery.

501

## 502 ACKNOWLEDGEMENTS

503 This study was carried out with permission from the Kenyan Government (Permit  
504 # NCST/5/002/R/483 to KPR). Funding from the University of Florida, Explorers  
505 Club, Sigma Xi, and the American Philosophical Society. Many thanks to intrepid  
506 field assistants Antony Eshwa, Alfred Inzauri, James Ekiru, and John Lemboi and  
507 to all the staff of the Mpala Research Centre. Sincerest thanks to Maureen  
508 Stanton, Rick Grosberg and Brenda Cameron for assistance with molecular  
509 work. Manuscript benefited tremendously from comments made by Lauryn  
510 Benedict, Neil Tstsui, Todd Palmer, Jake Goheen, Jane Brockman, Christine  
511 Miller, Dan Doak, Brian Silliman.

512

513

514 LITERATURE CITED

- 515 1. Maynard Smith & Price, G. R. 1973 The logic of animal conflict. *Nature* **246**,  
516 15–18. (doi:10.1038/246015a0)
- 517 2. Huntingford, F. A. & Turner, A. K. 1987 *Animal conflict*. Chapman & Hall/CRC.  
518 [cited 2012 Oct. 1].
- 519 3. Enquist, M. & Leimar, O. 1987 Evolution of fighting behaviour: The effect of  
520 variation in resource value. *J. Theor. Biol.* **127**, 187–205. (doi:10.1016/S0022-  
521 5193(87)80130-3)
- 522 4. Enquist, M. & Leimar, O. 1990 The evolution of fatal fighting. *Anim. Behav.* **39**,  
523 1–9. (doi:10.1016/S0003-3472(05)80721-3)
- 524 5. Innocent, T. M., West, S. A., Sanderson, J. L., Hyrkkänen, N. & Reece, S. E.  
525 2011 Lethal combat over limited resources: testing the importance of  
526 competitors and kin. *Behav. Ecol.* **22**, 923–931.
- 527 6. Maynard Smith, J. 1974 The theory of games and the evolution of animal  
528 conflicts. *J. Theor. Biol.* **47**, 209–221. (doi:10.1016/0022-5193(74)90110-6)
- 529 7. Grafen, A. 1987 The logic of divisively asymmetric contests: respect for  
530 ownership and the desperado effect. *Anim. Behav.* **35**, 462–467.  
531 (doi:10.1016/S0003-3472(87)80271-3)
- 532 8. Hsu, Y., Earley, R. L. & Wolf, L. L. 2006 Modulation of aggressive behaviour  
533 by fighting experience: mechanisms and contest outcomes. *Biol. Rev.* **81**, 33–  
534 74. (doi:10.1017/S146479310500686X)
- 535 9. Maynard Smith, J. 1982 *Evolution and the Theory of Games*. Cambridge, UK ;  
536 New York: Cambridge University Press.
- 537 10. Grether, G. F., Losin, N., Anderson, C. N. & Okamoto, K. 2009 The role of  
538 interspecific interference competition in character displacement and the  
539 evolution of competitor recognition. *Biol. Rev.* **84**, 617–635.  
540 (doi:10.1111/j.1469-185X.2009.00089.x)
- 541 11. Riechert, S. E. 1988 The Energetic Costs of Fighting. *Am. Zool.* **28**, 877–  
542 884.
- 543 12. Marden, J. H. & Waage, J. K. 1990 Escalated damselfly territorial contests  
544 are energetic wars of attrition. *Anim. Behav.* **39**, 954–959. (doi:10.1016/S0003-  
545 3472(05)80960-1)
- 546 13. Hammerstein, P. & Parker, G. A. 1982 The asymmetric war of attrition. *J.*  
547 *Theor. Biol.* **96**, 647–682. (doi:10.1016/0022-5193(82)90235-1)

- 548 14. Murray, M. G. 1987 The closed environment of the fig receptacle and its  
549 influence on male conflict in the old World fig wasp, *Philotrypesis pilosa*. *Anim.*  
550 *Behav.* **35**, 488–506. (doi:10.1016/S0003-3472(87)80274-9)
- 551 15. Hölldobler, B. & Wilson, E. O. 1990 *The Ants*. Harvard University Press.
- 552 16. Hölldobler, B. & Wilson, E. O. 2009 *The Superorganism: The Beauty,*  
553 *Elegance, and Strangeness of Insect Societies*. W. W. Norton & Company.
- 554 17. Alloway, T. M. 1980 The Origins of Slavery in Leptothoracine Ants  
555 (Hymenoptera: Formicidae). *Am. Nat.* **115**, 247–261. (doi:10.2307/2460596)
- 556 18. Polis, G. A. 1981 The Evolution and Dynamics of Intraspecific Predation.  
557 *Annu. Rev. Ecol. Syst.* **12**, 225–251. (doi:10.2307/2097111)
- 558 19. Moya-Laraño, J., Orta-Ocaña, J. M., Barrientos, J. A., Bach, C. & Wise, D.  
559 H. 2002 Territoriality in a cannibalistic burrowing wolf spider. *Ecology* **83**, 356–  
560 361.
- 561 20. Fouks, B., d'Etterre, P. & Nehring, V. 2011 Brood adoption in the leaf-  
562 cutting ant *Acromyrmex echinator*: adaptation or recognition noise? *Insectes*  
563 *Sociaux* **58**, 479–485. (doi:10.1007/s00040-011-0167-9)
- 564 21. Buschinger, A. 2009 Social parasitism among ants: a review  
565 (Hymenoptera: Formicidae). *Myrmecol. News* **12**, 219–235.
- 566 22. Bernasconi, G. & Strassmann, J. E. 1999 Cooperation among unrelated  
567 individuals: the ant foundress case. *Trends Ecol. Evol.* **14**, 477–482.  
568 (doi:10.1016/S0169-5347(99)01722-X)
- 569 23. Menzel, Schmitt, T. & Blüthgen, N. 2009 Intraspecific nestmate recognition  
570 in two parabiotic ant species: acquired recognition cues and low inter-colony  
571 discrimination. *Insectes Sociaux* **56**, 251–260. (doi:10.1007/s00040-009-0018-  
572 0)
- 573 24. Kronauer, D. J. C., Schöning, C., d'Etterre, P. & Boomsma, J. J. 2010  
574 Colony fusion and worker reproduction after queen loss in army ants. *Proc.*  
575 *Biol. Sci.* **277**, 755–763. (doi:10.1098/rspb.2009.1591)
- 576 25. Tschinkel, W. R. 1992 Brood raiding and the population dynamics of  
577 founding and incipient colonies of the fire ant, *Solenopsis invicta*. *Ecol.*  
578 *Entomol.* **17**, 179–188. (doi:10.1111/j.1365-2311.1992.tb01176.x)
- 579 26. Blomquist, G. J. & Bagnères, A.-G. 2010 *Insect Hydrocarbons: Biology,*  
580 *Biochemistry, and Chemical Ecology*. Cambridge University Press.



- 581 27. Heinze, D. J. 2008 Social Plasticity: Ecology, Genetics, and the Structure  
582 of Ant Societies. In *Ecology of Social Evolution* (eds D. J. Korb & D. J.  
583 Heinze), pp. 129–150. Springer Berlin Heidelberg. [cited 2013 Aug. 5].
- 584 28. Palmer 2004 Wars of attrition: colony size determines competitive  
585 outcomes in a guild of African acacia ants. *Anim. Behav.* **68**, 993–1004.  
586 (doi:10.1016/j.anbehav.2004.02.005)
- 587 29. Stanton, M. L., Palmer, T. M., Young, T. P., Evans, A. & Turner, M. L.  
588 1999 Sterilization and canopy modification of a swollen thorn acacia tree by a  
589 plant-ant. *Nature* **401**, 578–581. (doi:10.1038/44119)
- 590 30. Palmer, T. M., Young, T. P., Stanton, M. L. & Wenk, E. 2000 Short-term  
591 dynamics of an acacia ant community in Laikipia, Kenya. *Oecologia* **123**, 425–  
592 435. (doi:10.1007/s004420051030)
- 593 31. Palmer, T. M., Stanton, M. L., Young, T. P., Goheen, J. R., Pringle, R. M.  
594 & Karban, R. 2008 Breakdown of an ant-plant mutualism follows the loss of  
595 large herbivores from an African savanna. *Science* **319**, 192–195.  
596 (doi:10.1126/science.1151579)
- 597 32. Rubin, B. E. R., Anderson, R. M., Kennedy, D., Palmer, T. M., Stanton, M.  
598 L. & Lovette, I. J. 2013 Polygyny in the nest-site limited acacia-ant  
599 *Crematogaster mimosae*. *Insectes Sociaux* **60**, 231–241.  
600 (doi:10.1007/s00040-013-0287-5)
- 601 33. Hölldobler, B. 1979 Territoriality in Ants. *Proc. Am. Philos. Soc.* **123**, 211–  
602 218.
- 603 34. Palmer, T. M. & Brody, A. K. 2007 Mutualism as reciprocal exploitation:  
604 African plant-ants defend foliar but not reproductive structures. *Ecology* **88**,  
605 3004–3011.
- 606 35. Davidson, D. W., Longino, J. T. & Snelling, R. R. 1988 Pruning of Host  
607 Plant Neighbors by Ants: An Experimental Approach. *Ecology* **69**, 801–808.  
608 (doi:10.2307/1941029)
- 609 36. Rubin, B. E., Makarewich, C. A., Talaba, a. L., Stenzler, L., Bogdanowicz,  
610 S. M. & Lovette, I. J. 2009 Isolation and characterization of microsatellite  
611 markers from the acacia-ant *Crematogaster mimosae*. *Mol. Ecol. Resour.* **9**,  
612 1212–1214. (doi:10.1111/j.1755-0998.2009.02614.x)
- 613 37. Toonen, R. J. & Hughes, S. 2001 Increased throughput for fragment  
614 analysis on an ABI Prism® 377 automated sequencer using a membrane  
615 comb and STRand software. *Biotechniques* **31**, 1320–1325.

- 616 38. Jones, O. R. & Wang, J. 2010 COLONY: a program for parentage and  
617 sibship inference from multilocus genotype data. *Mol. Ecol. Resour.* **10**, 551–  
618 555. (doi:10.1111/j.1755-0998.2009.02787.x)
- 619 39. Wang, J. 2011 Coancestry: a Program for Simulating, Estimating and  
620 Analysing Relatedness and Inbreeding Coefficients. *Mol. Ecol. Resour.* **11**,  
621 141–145. (doi:10.1111/j.1755-0998.2010.02885.x)
- 622 40. Wang, J. 2007 Triadic IBD coefficients and applications to estimating  
623 pairwise relatedness. *Genet. Res.* **89**, 135.
- 624 41. Archie, E. A., Altmann, J. & Alberts, S. C. 2012 Social status predicts  
625 wound healing in wild baboons. *Proc. Natl. Acad. Sci.*  
626 (doi:10.1073/pnas.1206391109)
- 627 42. Goheen, J. R. & Palmer, T. M. 2010 Defensive Plant-Ants Stabilize  
628 Megaherbivore-Driven Landscape Change in an African Savanna. *Curr. Biol.*  
629 **20**, 1768–1772. (doi:10.1016/j.cub.2010.08.015)
- 630 43. Palmer, T. M. & Brody, A. K. 2012 Enough is enough: the effects of  
631 symbiotic ant abundance on herbivory, growth, and reproduction in an African  
632 acacia. *Ecology* **94**, 683–691. (doi:10.1890/12-1413.1)
- 633 44. Rudolph, K. P. & Palmer, T. M. 2013 Carbohydrate as Fuel for Foraging,  
634 Resource Defense and Colony Growth – a Long-term Experiment with the  
635 Plant-ant *Crematogaster nigriceps*. *Biotropica* **45**, 620–627.  
636 (doi:10.1111/btp.12040)
- 637 45. Palmer, T., Young, T. & Stanton, M. 2002 Burning bridges: priority effects  
638 and the persistence of a competitively subordinate acacia-ant in Laikipia,  
639 Kenya. *Oecologia* **133**, 372–379. (doi:10.1007/s00442-002-1026-1)
- 640 46. Johnstone, R. A. 2001 Eavesdropping and animal conflict. *Proc. Natl.*  
641 *Acad. Sci.* **98**, 9177–9180. (doi:10.1073/pnas.161058798)
- 642 47. Wood, W. F., Palmer, T. M. & Stanton, M. L. 2002 A comparison of  
643 volatiles in mandibular glands from three *Crematogaster* ant symbionts of the  
644 whistling thorn acacia. *Biochem. Syst. Ecol.* **30**, 217–222. (doi:10.1016/S0305-  
645 1978(01)00099-0)
- 646 48. Clutton-Brock, T. H., Albon, S. D., Gibson, R. M. & Guinness, F. E. 1979  
647 The logical stag: Adaptive aspects of fighting in red deer (*Cervus elaphus* L.).  
648 *Anim. Behav.* **27**, Part 1, 211–225. (doi:10.1016/0003-3472(79)90141-6)
- 649 49. Adams, E. S. 1990 Boundary disputes in the territorial ant *Azteca trigona*:  
650 effects of asymmetries in colony size. *Anim. Behav.* **39**, 321–328.  
651 (doi:10.1016/S0003-3472(05)80877-2)

- 652 50. Isbell, L. A. & Young, T. P. 2007 Interspecific and temporal variation of ant  
653 species within *Acacia drepanolobium* ant domatia, a staple food of patas  
654 monkeys (*Erythrocebus patas*) in Laikipia, Kenya. *Am. J. Primatol.* **69**, 1387–  
655 1398.
- 656 51. Abril, S., Oliveras, J. & Gomez, C. 2010 Effect of Temperature on the  
657 Development and Survival of the Argentine Ant, *Linepithema humile*. *J. Insect*  
658 *Sci.* **10**. (doi:10.1673/031.010.9701)
- 659 52. Offenberg, J., Peng, R., Nielsen, M. G. & Birkmose, D. 2012 The Effect of  
660 Queen and Worker Adoption on Weaver Ant (*Oecophylla smaragdina* F.)  
661 Queen Fecundity. *J. Insect Behav.* (doi:10.1007/s10905-011-9311-7)
- 662 53. Herbers, J. M. 2007 Watch your language! Racially loaded metaphors in  
663 scientific research. *BioScience* **57**, 104–105.
- 664 54. Kellner, K., Barth, B. & Heinze, J. 2009 Colony fusion causes within-  
665 colony variation in a parthenogenetic ant. *Behav. Ecol. Sociobiol.* **64**, 737–746.  
666 (doi:10.1007/s00265-009-0891-6)
- 667 55. Foitzik & Heinze, J. 1998 Nest site limitation and colony takeover in the  
668 ant *Leptothorax nylanderi*. *Behav. Ecol.* **9**, 367–375.  
669 (doi:10.1093/beheco/9.4.367)
- 670 56. Kronauer, D. J. C., Gadau, J. & Hölldobler, B. 2003 Genetic Evidence for  
671 Intra- and Interspecific Slavery in Honey Ants (Genus *Myrmecocystus*). *Proc.*  
672 *Biol. Sci.* **270**, 805–810.
- 673 57. AntWeb In press. *AntWeb*.
- 674 58. D’Ettorre, P. & Heinze, J. 2001 Sociobiology of slave-making ants. *Acta*  
675 *Ethologica* **3**, 67–82.
- 676 59. Moreau, C. S., Bell, C. D., Vila, R., Archibald, S. B. & Pierce, N. E. 2006  
677 Phylogeny of the Ants: Diversification in the Age of Angiosperms. *Science* **312**,  
678 101–104. (doi:10.1126/science.1124891)
- 679 60. Fiala, B. & Maschwitz, U. 1990 Studies on the south east Asian ant-plant  
680 association *Crematogaster borneensis*/Macaranga: Adaptations of the ant  
681 partner. *Insectes Sociaux* **37**, 212–231. (doi:10.1007/BF02224049)
- 682 61. Hölldobler, B. 1976 Tournaments and slavery in a desert ant. *Science*  
683 **192**, 912–914. (doi:10.1126/science.192.4242.912)
- 684 62. Bartz, S. H. & Hölldobler, B. 1982 Colony Founding in *Myrmecocystus*  
685 *mimicus* Wheeler (Hymenoptera: Formicidae) and the Evolution of Foundress  
686 Associations. *Behav. Ecol. Sociobiol.* **10**, 137–147.

- 687 63. Nonacs, P. 1993 The economics of brood raiding and nest consolidation  
688 during ant colony founding. *Evol. Ecol.* **7**, 625–633. (doi:10.1007/BF01237825)
- 689 64. Katzerke, A., Neumann, P., Pirk, C. W. W., Bliss, P. & Moritz, R. F. A.  
690 2006 Seasonal Nestmate Recognition in the Ant *Formica exsecta*. *Behav.*  
691 *Ecol. Sociobiol.* **61**, 143–150.
- 692 65. Steiner, F. M. et al. 2007 Abandoning aggression but maintaining self-  
693 nonself discrimination as a first stage in ant supercolony formation. *Curr. Biol.*  
694 **17**, 1903–1907.
- 695 66. Lumsden, C. J. & Hölldobler, B. 1983 Ritualized combat and intercolony  
696 communication in ants. *J. Theor. Biol.* **100**, 81–98. (doi:10.1016/0022-  
697 5193(83)90093-0)
- 698 67. Moore, J. C., Obbard, D. J., Reuter, C., West, S. A. & Cook, J. M. 2008  
699 Fighting strategies in two species of fig wasp. *Anim. Behav.* **76**, 315–322.  
700 (doi:10.1016/j.anbehav.2008.01.018)
- 701 68. D’Ettorre, P. & Lenoir, A. 2010 Nestmate Recognition. *Ant Ecol.* , 194–  
702 209.
- 703 69. Van Zweden, J. S., Brask, J. B., Christensen, J. H., Boomsma, J. J.,  
704 Linksvayer, T. A. & d’ ETTORRE, P. 2010 Blending of heritable recognition  
705 cues among ant nestmates creates distinct colony gestalt odours but prevents  
706 within-colony nepotism. *J. Evol. Biol.* **23**, 1498–1508. (doi:10.1111/j.1420-  
707 9101.2010.02020.x)
- 708 70. Gadau, J., Strehl, C. -P, Oettler, J. & Hölldobler, B. 2003 Determinants of  
709 intracolony relatedness in *Pogonomyrmex rugosus* (Hymenoptera;  
710 Formicidae): mating frequency and brood raids. *Mol. Ecol.* **12**, 1931–1938.  
711 (doi:10.1046/j.1365-294X.2003.01853.x)
- 712 71. Pollock, G. B. & Rissing, S. W. 1989 Intraspecific Brood Raiding,  
713 Territoriality, and Slavery in Ants. *Am. Nat.* **133**, 61–70.
- 714 72. Mabelis, A. A. 1978 Wood Ant Wars the Relationship Between Aggression  
715 and Predation in the Red Wood Ant (*Formica Polytenta* Forst.) by. *Neth. J.*  
716 *Zool.* **29**, 451–620. (doi:10.1163/002829679X00016)
- 717  
718  
719

1 Table 1.

2 Sampling design, colony relationships, and experimental fight outcomes for *Crematogaster*  
3 *mimosae*

4

5 Figure 1

6 Vulnerability following conspecific conflict. Winner colonies decreased defense after battles.

7 Mean +SE change in the number of ants guarding host trees in canopies (A) and on main stems  
8 (B) relative to pre-fight levels. Unmanipulated controls did not show a decrease in defense over  
9 the same period.

10

11 Figure 2

12 Average within colony relatedness over time for each fight manipulation. Pre-fight relatedness  
13 values are from fight winner colonies (except for ID3 and ID9). For these two colonies where no  
14 definitive loser could be identified, values are an average of within Pre-fight Colony A and B  
15 relatedness. Workers collected 2 months after fights were significantly less related on average  
16 to their nestmate contemporaries than workers sampled before fights and brood sampled 8  
17 months after ( $P < 0.0001$ ). Winner colonies ID4 and ID7 (open symbols) contained no loser  
18 genotypes 2mo after fights. Solid symbols identify colonies with enemy adoptees (loser  
19 genotypes present at 2mo but not at 8mo). Line symbols identify colonies with no definitive fight  
20 winner where colony fusion is inferred (both pre-fight colony genotypes are present in workers  
21 at 2mo and brood at 8mo).

22

23 Figure 3

24 Images of experimental fights. Conflict induced by joining host tree canopies of separate  
25 colonies (A) with a tarp to catch casualties. (B) *Crematogaster mimosae* battle in progress on  
26 the surface of a contested domatia.

27 Table 1..

| Fight pair ID | sample n (A, B, 2mo, 8mo) <sup>a</sup> | # loci (A, B, 2mo, 8mo) <sup>b</sup> | # queens (A, B, 2mo, 8mo) | Winner (behav assay) | Winner (molecular data) | Adopt enemies <sup>c</sup> | Prop adoptees (at 2mo) | Between colony relatedness (A vs B) <sup>d</sup> | A and B genotypes present after 8mo? <sup>e</sup> |
|---------------|----------------------------------------|--------------------------------------|---------------------------|----------------------|-------------------------|----------------------------|------------------------|--------------------------------------------------|---------------------------------------------------|
| 4             | 8, 8, 48, 22                           | 17, 17, 4, 17                        | 1,1,1,1                   | unclear              | A                       | no                         | 0                      | 0                                                | no                                                |
| 7             | 8, 8, 44, 24                           | 17, 17, 5, 17                        | 1,1,1,1                   | unclear              | B                       | no                         | 0                      | 0                                                | no                                                |
| 1             | 8, 8, 47, 24                           | 17, 17, 4, 17                        | 1,1,2,1                   | unclear              | B                       | yes                        | 0.21                   | 0                                                | no                                                |
| 2             | 8, 8, 46, 23                           | 17, 17, 4, 17                        | 1,2,3,1                   | A                    | A                       | yes ★                      | 0.17                   | 0.08                                             | no                                                |
| 5             | 8, 8, 47, 23                           | 17, 17, 4, 17                        | 1,1,2,1                   | A                    | A                       | yes                        | 0.44                   | 0.04                                             | no                                                |
| 6             | 8, 8, 47, 23                           | 17, 17, 3, 17                        | 1,1,2,1                   | A                    | A                       | yes                        | 0.04                   | 0                                                | no                                                |
| 8             | 8, 8, 45, 24                           | 17, 17, 4, 17                        | 1,1,2,1                   | B                    | B                       | yes                        | 0.04                   | 0                                                | no                                                |
| 9             | 8, 8, 47, 23                           | 17, 17, 5, 17                        | 1,2,3,2                   | unclear              | ?                       | °                          | fusion                 | 0.04                                             | yes                                               |
| 3             | 8, 8, 46, 21                           | 17, 17, 4, 17                        | 1,1,2,3                   | A                    | ?                       | unclear #                  | fusion                 | 0.03                                             | yes                                               |

28

A = individuals collected from A tree (Pre-fight)

B = individuals collected from B tree (Pre-fight)

2mo = individuals from joined A+B trees (2 months after fight)

8mo = individuals from joined A+B trees (8 months after fight)

<sup>a</sup> n - number of individuals (indv) genotyped from each period (A, B, 2mo all indv = workers; 8mo indv = pupae or larvae)

<sup>b</sup> 2mo loci restricted to those with diagnostic alleles differentiating A and B genotypes

<sup>c</sup> Proportion of sample individuals assigned as full sibs with loser colony genotype with (inclusion/exclusion probability > 0.99).

Exceptions-

★ ID 2 - half sibs with B = 7 indv ( $p > 0.95$ )

° ID 9 - full or half sib with B = 20 indv ( $p > 0.85$ ), full sib with A = 28 indv ( $p > 0.99$ )

# ID 3 - full sib with B = 24 indv, A = 22 indv ( $p > 0.99$ )

<sup>d</sup> average pairwise relatedness (TrioML estimator in COANCESTRY (Wang 2011))

<sup>e</sup> no = all brood excluded as full sibs with loser genotype at  $p > 0.99$ ; for yes – ID 9 (12 indv full sib with A, 11 indv with B),

ID 3 (4 indv full sib with A, 1 indv with B, 16 indv were offspring of a new queen).

A

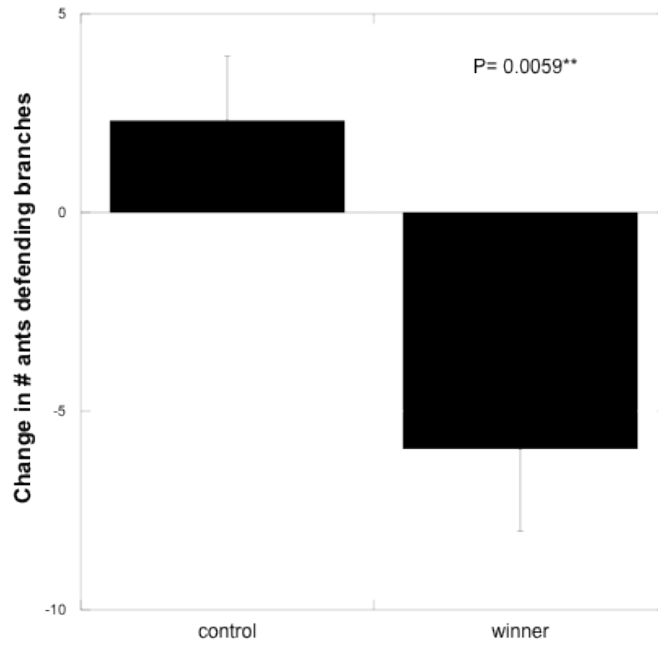

B

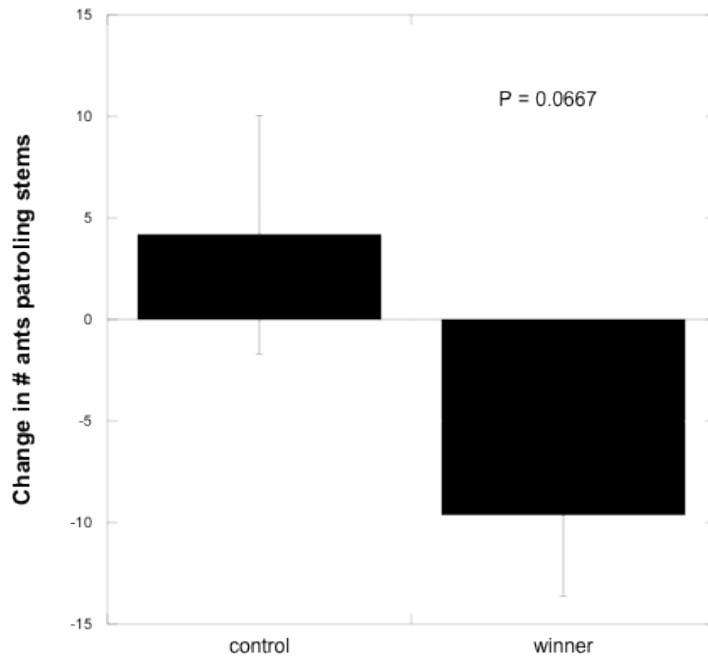

Figure 1.

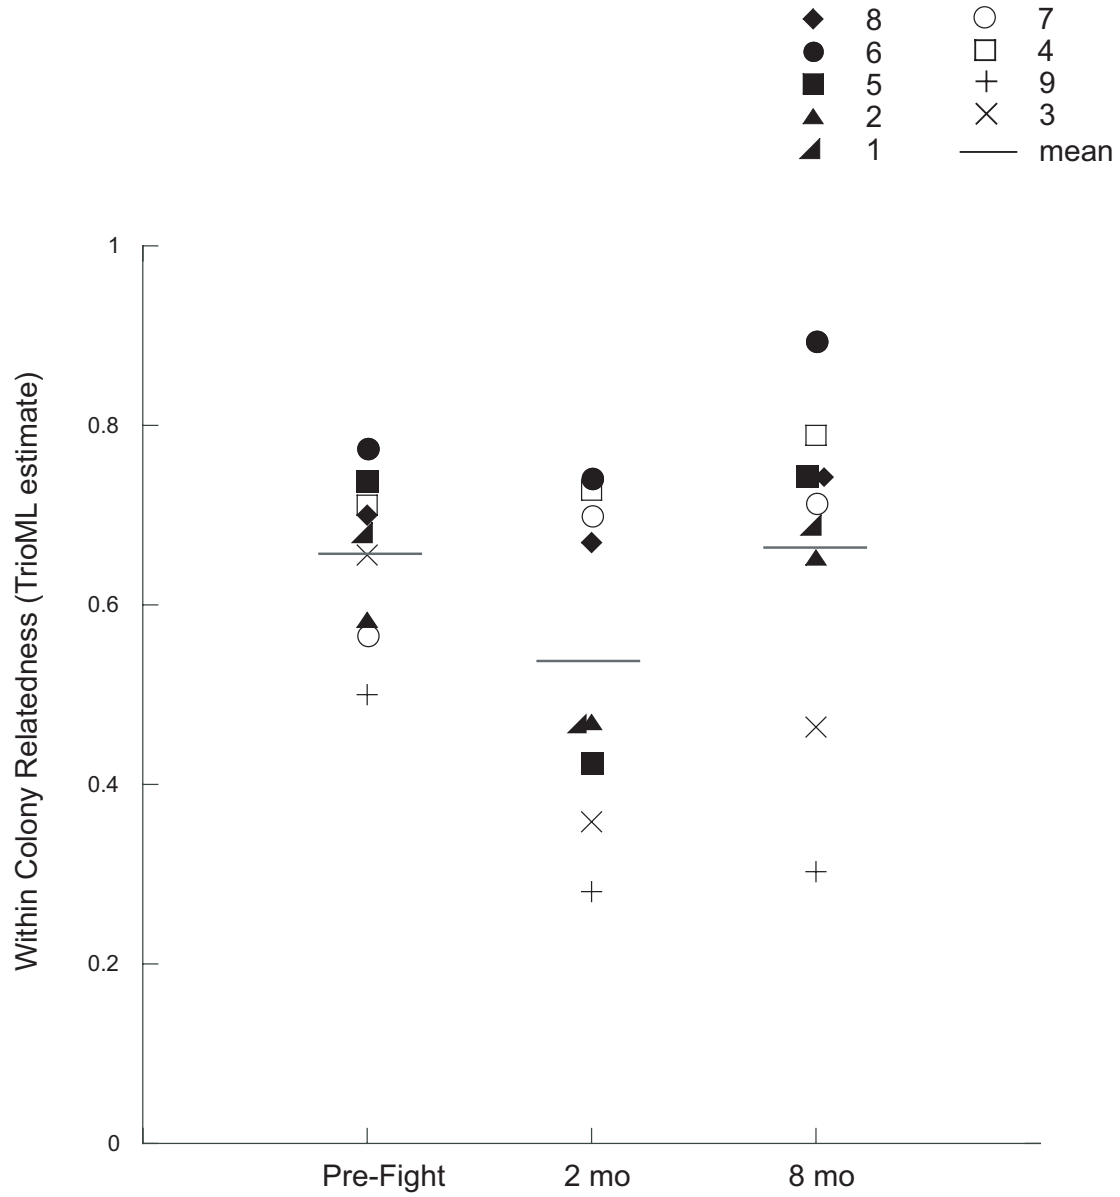

Figure 2.



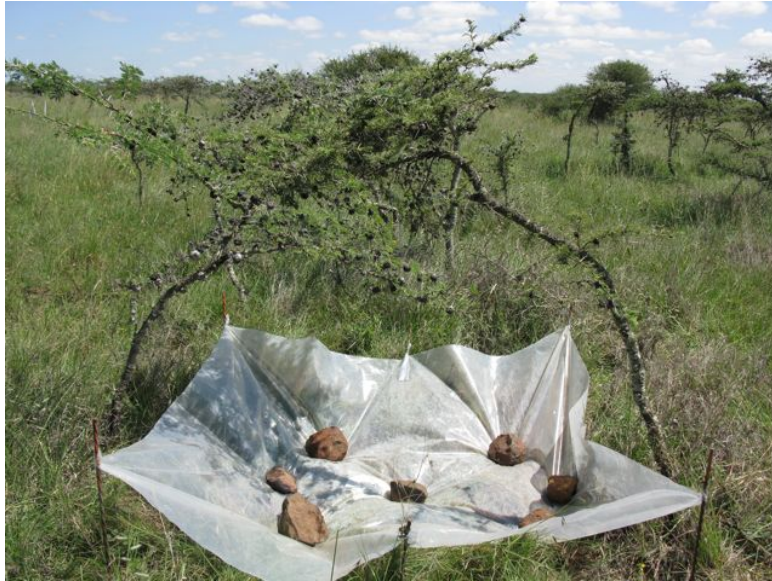

A

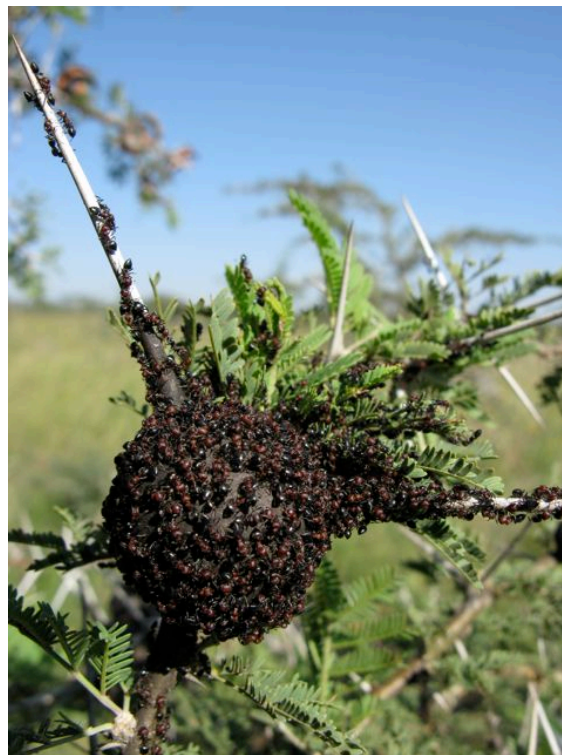

B

Figure 3. *(in color web and print)*
